# Supplementary material for: Copper-diphosphine complex catalysts for N-formylation of amines under 1 atm of carbon dioxide with polymethylhydrosiloxane
Source: Royal Society of Chemistry journal article supplement (doi:10.1039/c3cy00375b), 2013-01-01
Supplement: c3cy00375b.pdf [file c3cy00375b.pdf]

## Electronic Supplementary Information (ESI)

### Copper-Diphosphine Complex Catalysts for *N*-Formylation of Amines under 1 atm of Carbon Dioxide with Polymethylhydrosiloxane

Ken Motokura, Naoki Takahashi, Daiki Kashiwame, Sho Yamaguchi, Akimitsu Miyaji and Toshihide Baba\*

Department of Environmental Chemistry and Engineering, Interdisciplinary Graduate School of Science and Engineering, Tokyo Institute of Technology, 4259 Nagatsuta-cho, Midori-ku, Yokohama, 226-8502, Japan

#### Experimental procedures

Proton ( $^1\text{H}$ ) and carbon ( $^{13}\text{C}$ ) nuclear magnetic resonance (NMR) spectra were recorded in  $\text{CDCl}_3$  with a Bruker AVANCE 400 spectrometer operating at 400 and 100.61 MHz, respectively. A Shimadzu QP5000 instrument equipped with a DB-1 column was used for GC-MS analysis.

$\text{Cu}(\text{OAc})_2 \cdot \text{H}_2\text{O}$  (Cu content >99.99%) was purchased from Aldrich Inc. Polymethylhydrosiloxane (PMHS) was purchased from WAKO Pure Chemicals (FW: *ca.* 1900). Unless otherwise noted, all other materials were purchased from Wako Pure Chemicals, Tokyo Kasei Co., Kanto Kagaku Co., or Aldrich Inc. *p*-Xylene or mesitylene was used as an internal standard.

#### Typical Procedure for Formylation of Amines under $\text{CO}_2$ with PMHS

Into a glass reactor equipped with a  $\text{CO}_2$  balloon were placed  $\text{Cu}(\text{OAc})_2 \cdot \text{H}_2\text{O}$  (Cu:  $1.0 \times 10^{-3}$  mmol), 1,2-bis(diisopropylphosphino)benzene (**1a**, P:  $3.0 \times 10^{-3}$  mmol), piperidine (1.4 mmol), PMHS (0.211 g, Si-H: 3.2 mmol), and 1,4-dioxane (5.0 mL). The resulting mixture was stirred vigorously at 80 °C for 5 h.  $^1\text{H}$  NMR analysis of the reaction mixture showed a 98% yield of *N*-formylpiperidine. Formamide products were identified by comparison with reported  $^1\text{H}$  NMR and GC-MS data. Yield and conversion were determined using a  $\text{CDCl}_3$  solution of the reaction mixture by the internal standard technique. Mesitylene or 1,3,5-triisopropylbenzene was used as an internal standard. The products were confirmed by the comparison of their GC-MS spectra, and/or  $^1\text{H}$  and  $^{13}\text{C}$  NMR spectra with those of authentic data.

#### Regioselective Formylation (Table 2, entry 14)

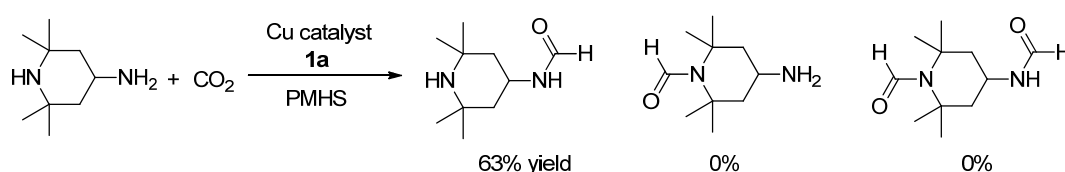

Into a glass reactor equipped with a CO<sub>2</sub> balloon were placed Cu(OAc)<sub>2</sub>·H<sub>2</sub>O (Cu: 1.0×10<sup>-3</sup> mmol), 1,2-bis(diisopropylphosphino)benzene (**1a**, P: 1.0×10<sup>-2</sup> mmol), 2,2,6,6-tetramethylpiperidin-4-amine (1.4 mmol), PMHS (0.211 g, Si-H: 3.2 mmol), and 1,4-dioxane (5.0 mL). The resulting mixture was stirred vigorously at 80 °C for 24 h. <sup>1</sup>H NMR analysis using a CDCl<sub>3</sub> solution of the reaction mixture showed a 63% yield of regioselective formylated product. Other formylated products were not detected in either <sup>1</sup>H NMR or GC-MS. The resulting reaction mixture was purified over a column of silica gel (C200) and eluted (ethyl acetate --> acetone) to give the isolated product. The product was identified by MS, <sup>1</sup>H NMR, <sup>13</sup>C NMR, and <sup>1</sup>H-<sup>1</sup>H COSY NMR spectroscopy (Figure S1).

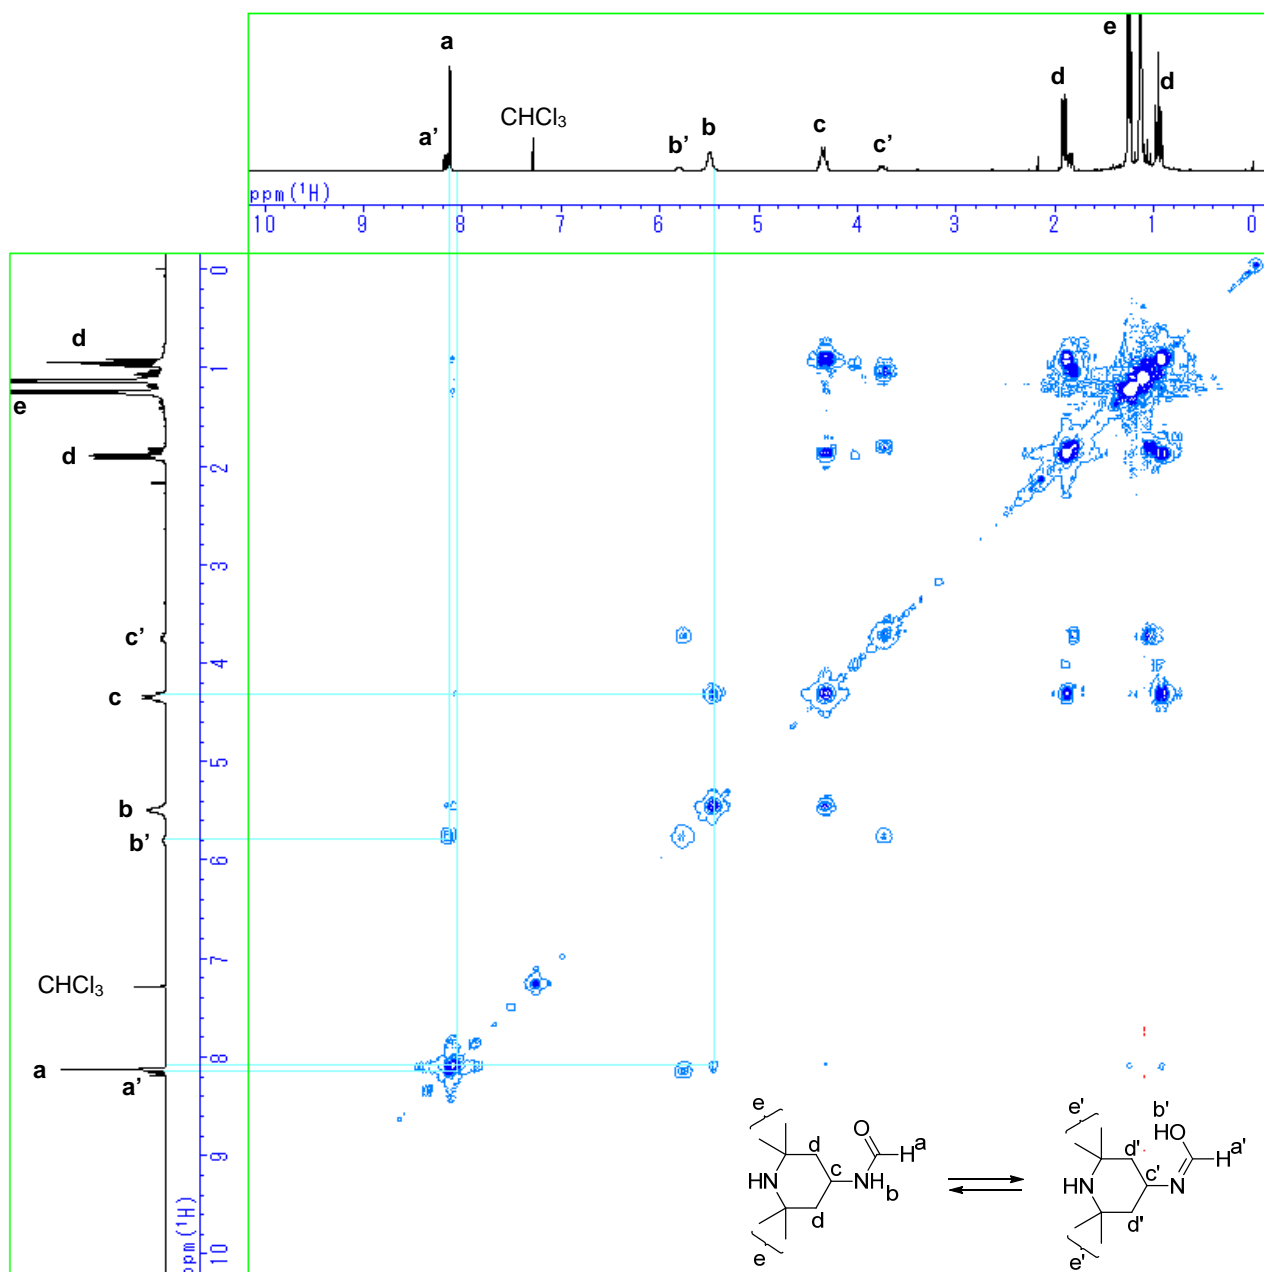

**Figure S1** <sup>1</sup>H-<sup>1</sup>H COSY analysis of the regioselective formylation product.

**Table S1** List of Catalysts for Formylation of Amines with CO<sub>2</sub> and Hydrosilanes

| Amine      | Catalyst                           | CO <sub>2</sub><br>(atm) | Hydrosilane                  | Time / temp                                                     | TON                               | Ref         |
|------------|------------------------------------|--------------------------|------------------------------|-----------------------------------------------------------------|-----------------------------------|-------------|
| Piperidine | Cu- <b>1b</b>                      | 1                        | PMHS                         | 23 h / 80 °C                                                    | 11700                             | <i>This</i> |
| Morpholine | Cu- <b>1b</b>                      | 1                        | PMHS                         | 22 h / 80 °C                                                    | 9000                              | <i>Work</i> |
| Piperidine | TBD                                | 1                        | PhSiH <sub>3</sub>           | 24 h / 100 °C                                                   | 20                                | [S1]        |
| Morpholine | NHC                                | 1                        | PhSiH <sub>3</sub> ,<br>PMHS | 1 h / rt                                                        | 20<br>(TOF: 160 h <sup>-1</sup> ) | [S2]        |
| Piperidine | Rh <sub>2</sub> (OAc) <sub>4</sub> | 1                        | PhSiMe <sub>2</sub> H        | 2 h / 50 °C (hydrosilylation),<br>1 h / 50 °C (amide formation) | 200                               | [S3]        |

**Table S2** List of Catalysts for Formylation of Amines other than Dimethylamine with CO<sub>2</sub> and H<sub>2</sub>

| Amine                                                      | Catalyst                                                | CO <sub>2</sub> (atm)    | H <sub>2</sub><br>(atm) | Time / Temp   | TON                           | Ref   |
|------------------------------------------------------------|---------------------------------------------------------|--------------------------|-------------------------|---------------|-------------------------------|-------|
| Piperidine                                                 | Na[HRu <sub>3</sub> (CO) <sub>11</sub> ]                | 60                       | 60                      | 24 h / 140 °C | 850                           | [S4]  |
| NH(C <sub>2</sub> H <sub>5</sub> ) <sub>2</sub>            | Ru-silica-hybrid<br>aerogel                             | 180 (total)              | 180<br>(total)          | -             | (TOF: 18400 h <sup>-1</sup> ) | [S5]  |
| NH( <i>n</i> -C <sub>3</sub> H <sub>7</sub> ) <sub>2</sub> | RuCl <sub>2</sub> (dppe) <sub>2</sub>                   | 276 (total)              | 55                      | 5 h / 80 °C   | 110                           | [S6]  |
| Piperidine                                                 | RuCl <sub>2</sub> (dppe) <sub>2</sub>                   | 180 (total)              | 88                      | 3 h / 100 °C  | 117780                        | [S7]  |
| Morpholine                                                 | RuCl <sub>2</sub> (dppe) <sub>2</sub>                   | 180 (total)              | 88                      | 3 h / 100 °C  | 205200                        | [S7]  |
| Morpholine                                                 | RuCl <sub>2</sub> (bspe) <sub>2</sub> /SiO <sub>2</sub> | 100 g (200<br>bar total) | 80                      | 20 h / 100 °C | 3416                          | [S8]  |
| Piperidine                                                 | Fe(BF <sub>4</sub> ) <sub>2</sub><br>tetrphos           | /<br>30                  | 60                      | 20 h / 100 °C | 373                           | [S9]  |
| Piperidine                                                 | Co(BF <sub>4</sub> ) <sub>2</sub> · 6H <sub>2</sub> O   | 30                       | 60                      | 20 h / 100 °C | 1254                          | [S10] |

#### References

- [S1] C. Das Neves Gomes, O. Jacquet, C. Villiers, P. Thuéry, M. Ephritikhine, T. Cantat, *Angew. Chem. Int. Ed.* 2012, **51**, 187.
- [S2] O. Jacquet, C. Das Neves Gomes, M. Ephritikhine, T. Cantat, *J. Am. Chem. Soc.* 2012, **134**, 2934.
- [S3] S. Itagaki, K. Yamaguchi, N. Mizuno, *J. Mol. Catal. A Chem.* 2013, **366**, 347.
- [S4] G. Süss-Fink, M. Langenbahn, T. Jenke, *J. Organomett. Chem.* 1989, **368**, 103.
- [S5] L. Schmid, M. Rohr, A. Baiker, *Chem. Commun.* 1999, 2303.
- [S6] F. Liu, M. B. Abrams, R. T. Baker, W. Tumas, *Chem. Commun.* 2001, 433.
- [S7] L. Schmid, A. Canonica, A. Baiker, *Appl. Catal. A General* 2003, **255**, 23.
- [S8] M. Rohr, M. Günther, F. Jutz, J.-D. Grunwaldt, H. Emerich, W. van Beek, A. Baiker, *Appl. Catal. A General* 2005, **296**, 238.
- [S9] C. Fedesel, A. Boddien, R. Jackstell, R. Jennerjahn, P. J. Dyson, R. Scopelliti, G. Laurenczy, M. Beller, *Angew. Chem. Int. Ed.* 2010, **49**, 9777.
- [S10] C. Federsel, C. Ziebart, R. Jackstell, W. Baumann, M. Beller, *Chem. Eur. J.* 2012, **18**, 72.
